# Supplementary material for: Size matters: asphaltenes with enlarged aromatic cores promote heat transfer in organic phase-change materials
Source: Royal Society of Chemistry journal article supplement (doi:10.1039/d3cp02953k), 2023-01-01
Supplement: d3cp02953k1.pdf [file d3cp02953k1.pdf]

*Electronic Supplementary Information for*

**Size matters: asphaltenes with enlarged aromatic cores promote heat transfer  
in organic phase-change materials**

Artem D. Glova,<sup>a</sup> Victor M. Nazarychev,<sup>b</sup> Sergey V. Larin,<sup>b</sup> Andrey A. Gurtovenko<sup>b</sup> and Sergey V. Lyulin<sup>\*b</sup>

<sup>a</sup>*Department of Physics and Astronomy, The University of Western Ontario, 1151 Richmond Street, London, Ontario, N6A 3K7, Canada.*

<sup>b</sup>*Institute of Macromolecular Compounds, Russian Academy of Sciences, Bolshoi Prospekt V.O. 31, St. Petersburg, 199004, Russia.*

*E-mail: sergey.v.lyulin@gmail.com*

## Equilibration of paraffin-asphaltene samples

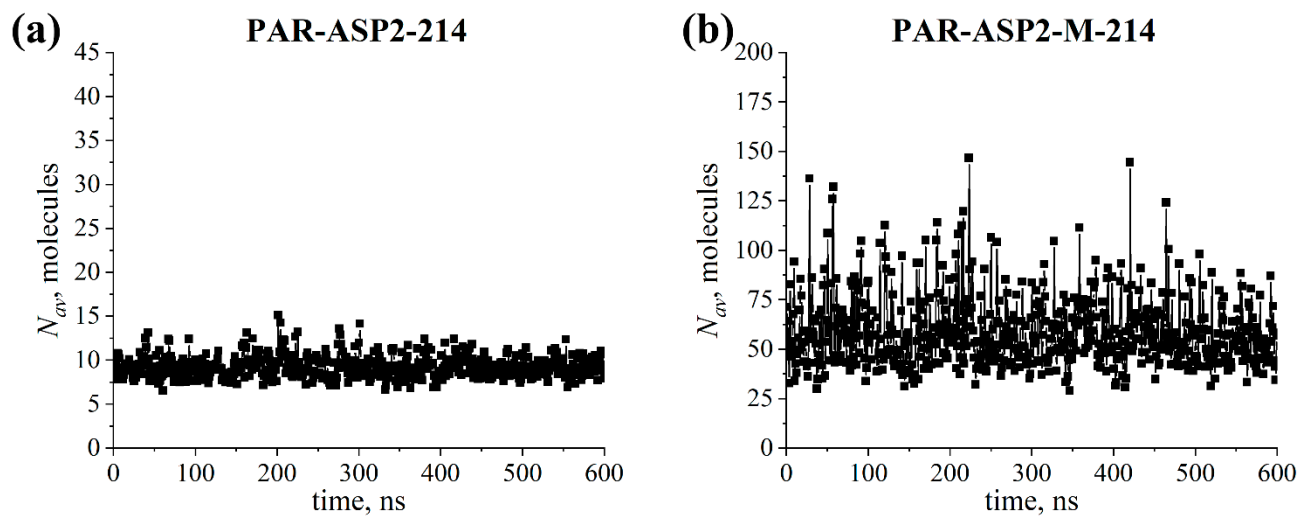

**Fig. S1.** Time dependence of average sizes  $N_{av}$  of asphaltene aggregates in the (a) PAR-ASP2-214 and (b) PAR-ASP2-M-214 systems.

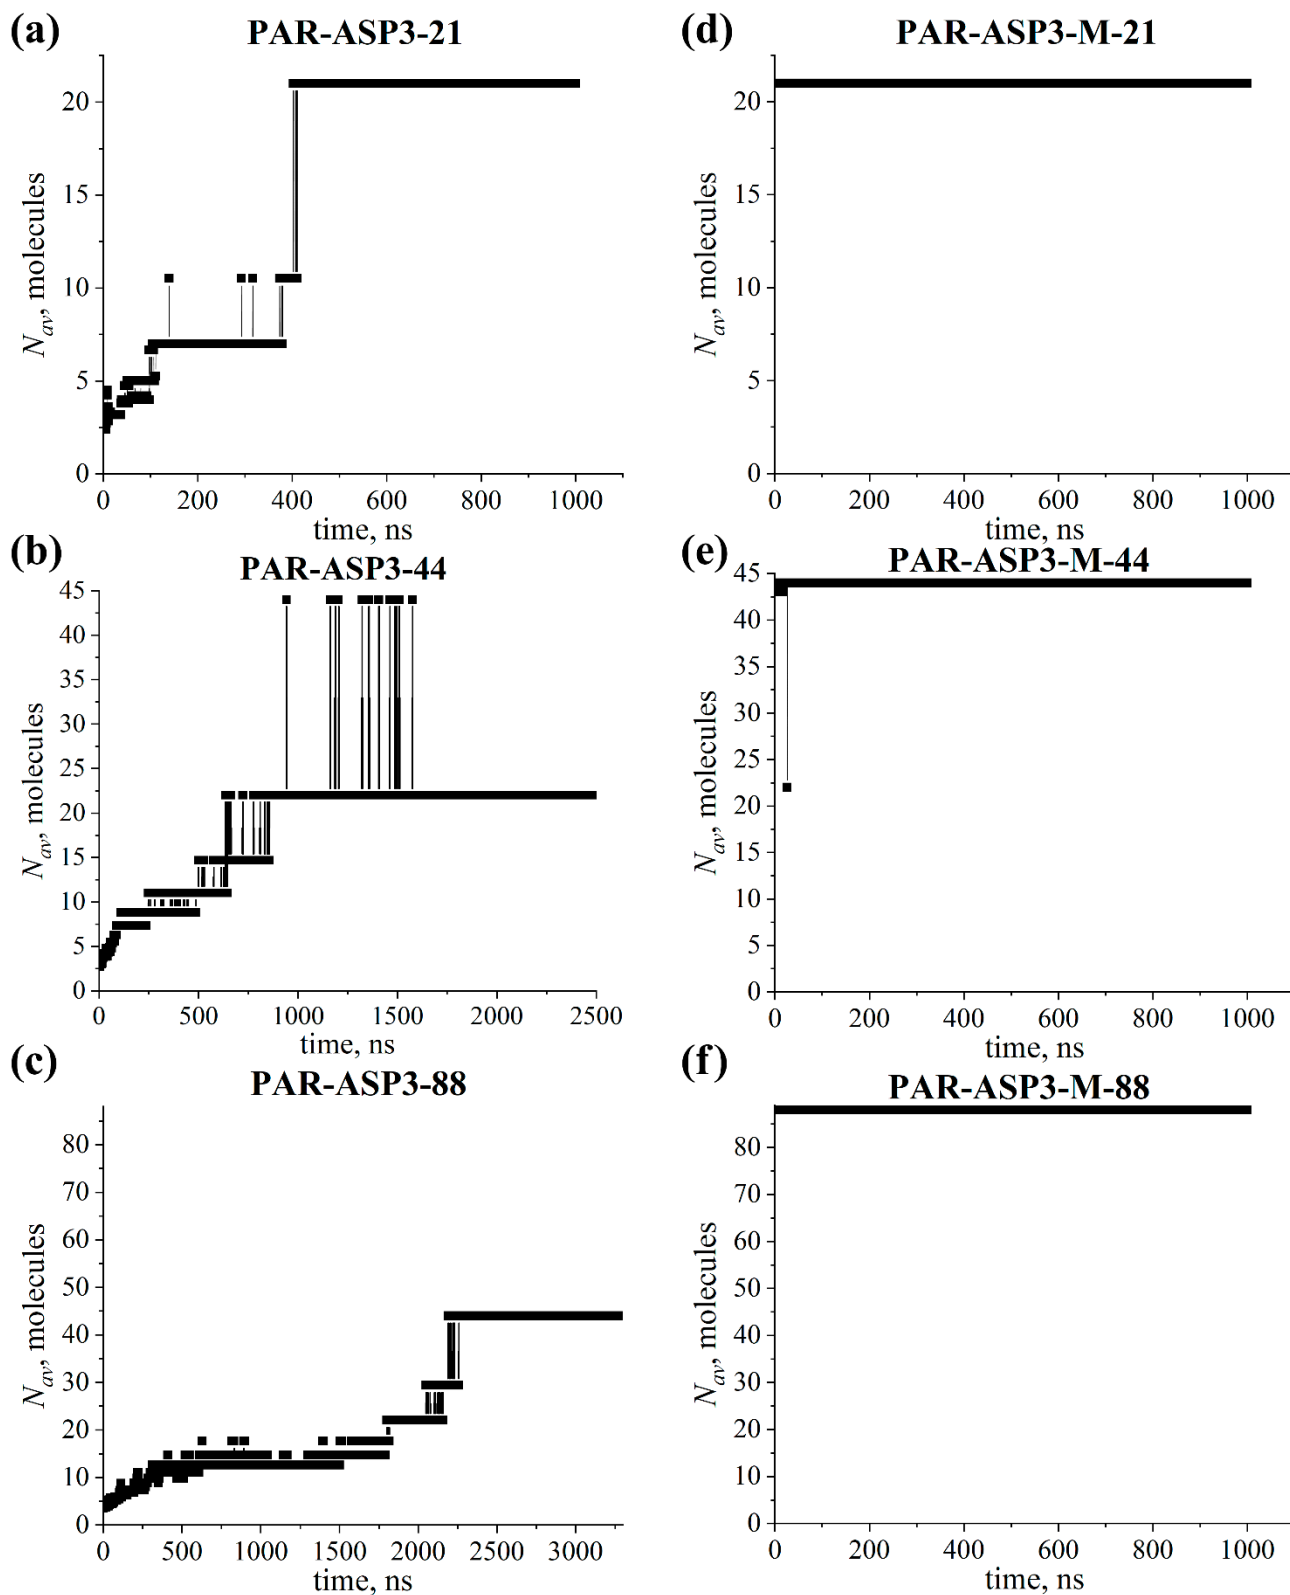

**Fig. S2.** Time dependence of average sizes  $N_{av}$  of asphaltene aggregates in the (a) PAR-ASP3-21, (b) PAR-ASP3-44, (c) PAR-ASP3-88, (d) PAR-ASP3-M-21, (e) PAR-ASP3-M-44, and (f) PAR-ASP3-M-88 systems.

## Anisotropy of the thermal conductivity tensor

**Table S1.** Components of the thermal conductivity tensor of the systems studied.

| System         | Thermal conductivity coefficient, $\kappa$ , W/(m·K) |                 |                 |                          |
|----------------|------------------------------------------------------|-----------------|-----------------|--------------------------|
|                | $\kappa_{xx}$                                        | $\kappa_{yy}$   | $\kappa_{zz}$   | $\langle \kappa \rangle$ |
| PAR-ASP1-44    | $0.30 \pm 0.02$                                      | $0.33 \pm 0.04$ | $0.22 \pm 0.03$ | $0.28 \pm 0.02$          |
| PAR-ASP1-99    | $0.23 \pm 0.03$                                      | $0.20 \pm 0.01$ | $0.20 \pm 0.02$ | $0.21 \pm 0.01$          |
| PAR-ASP1-214   | $0.20 \pm 0.01$                                      | $0.19 \pm 0.03$ | $0.29 \pm 0.03$ | $0.23 \pm 0.01$          |
| PAR-ASP2-214   | $0.20 \pm 0.01$                                      | $0.26 \pm 0.02$ | $0.18 \pm 0.02$ | $0.21 \pm 0.01$          |
| PAR-ASP3-21    | $0.32 \pm 0.01$                                      | $0.31 \pm 0.02$ | $0.25 \pm 0.02$ | $0.29 \pm 0.01$          |
| PAR-ASP3-44    | $0.29 \pm 0.01$                                      | $0.34 \pm 0.01$ | $0.51 \pm 0.02$ | $0.38 \pm 0.01$          |
| PAR-ASP3-88    | $0.35 \pm 0.01$                                      | $0.32 \pm 0.01$ | $0.30 \pm 0.01$ | $0.32 \pm 0.02$          |
| PAR-ASP1-M-44  | $0.28 \pm 0.01$                                      | $0.22 \pm 0.02$ | $0.22 \pm 0.04$ | $0.24 \pm 0.02$          |
| PAR-ASP1-M-99  | $0.31 \pm 0.05$                                      | $0.28 \pm 0.04$ | $0.49 \pm 0.02$ | $0.36 \pm 0.01$          |
| PAR-ASP1-M-214 | $0.91 \pm 0.04$                                      | $0.43 \pm 0.04$ | $0.78 \pm 0.04$ | $0.71 \pm 0.02$          |
| PAR-ASP2-M-214 | $0.27 \pm 0.01$                                      | $0.22 \pm 0.01$ | $0.22 \pm 0.02$ | $0.24 \pm 0.01$          |
| PAR-ASP3-M-21  | $0.33 \pm 0.03$                                      | $0.43 \pm 0.02$ | $0.32 \pm 0.02$ | $0.36 \pm 0.01$          |
| PAR-ASP3-M-44  | $0.81 \pm 0.02$                                      | $0.55 \pm 0.01$ | $0.63 \pm 0.02$ | $0.66 \pm 0.01$          |
| PAR-ASP3-M-88  | $1.44 \pm 0.03$                                      | $0.97 \pm 0.02$ | $0.56 \pm 0.04$ | $0.99 \pm 0.02$          |

## Convergence of thermal conductivity calculations

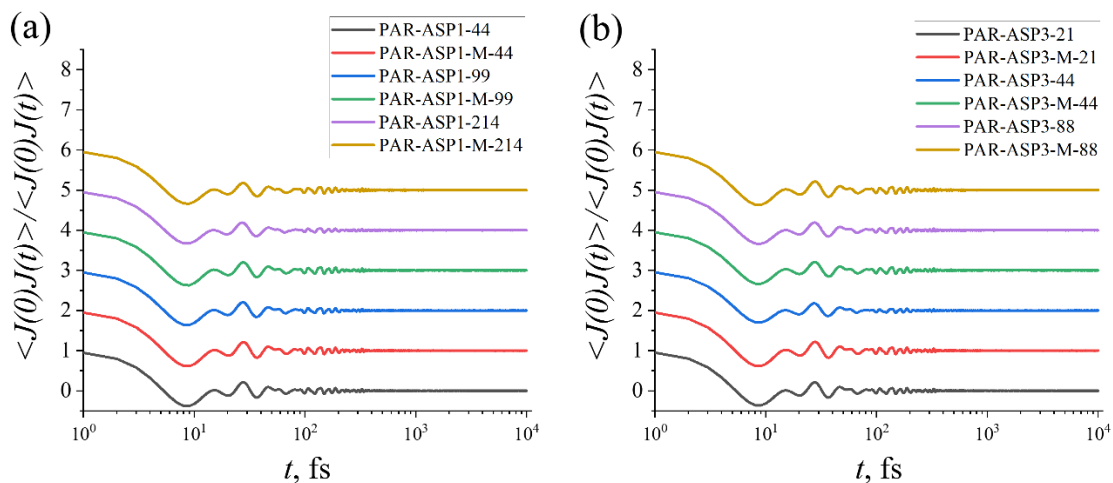

**Fig. S3.** Normalized autocorrelation functions of heat flux (HFACF) for selected paraffin-asphaltene systems as a function of time ( $T=450$  K). Shown are the results for the last 10 ps interval of 1 ns-long NVE trajectories; the HFACF curves for other 10 ps intervals demonstrate similar behavior. Presented are the systems with ASP1/ASP1-M (a) and ASP3/ASP3-M (b) asphaltenes. For clarity, the curves for different systems are arbitrarily shifted relative to each other.

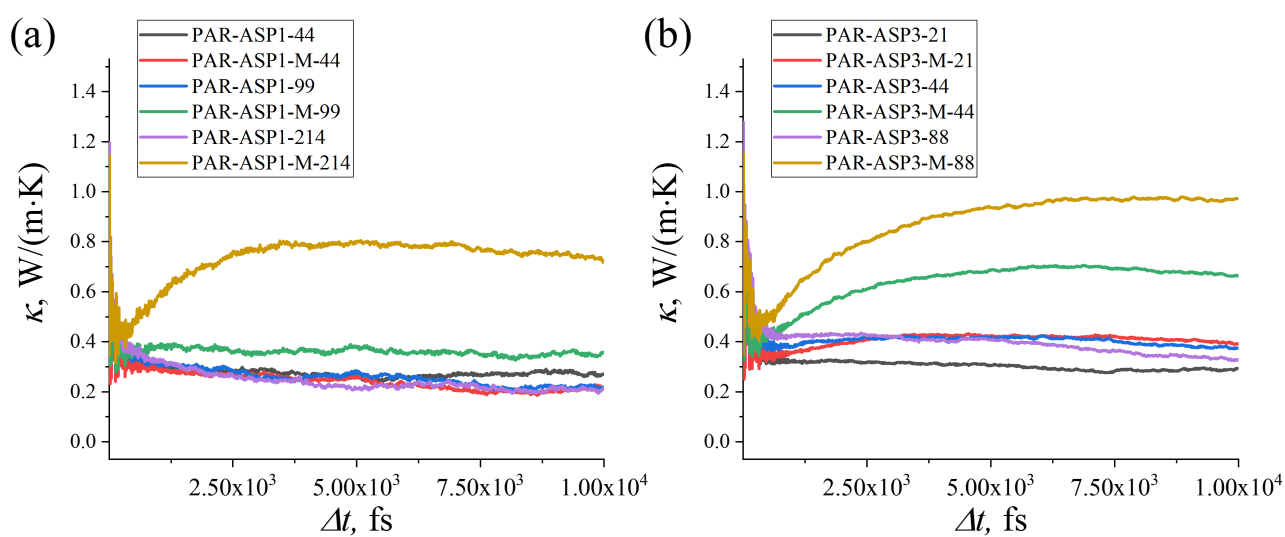

**Fig. S4.** The thermal conductivity coefficients calculated by the integration of the HFACFs presented in Fig. S3 as a function of time  $\Delta t$  used for the integration. Presented are the systems with ASP1/ASP1-M (a) and ASP3/ASP3-M (b) asphaltenes.

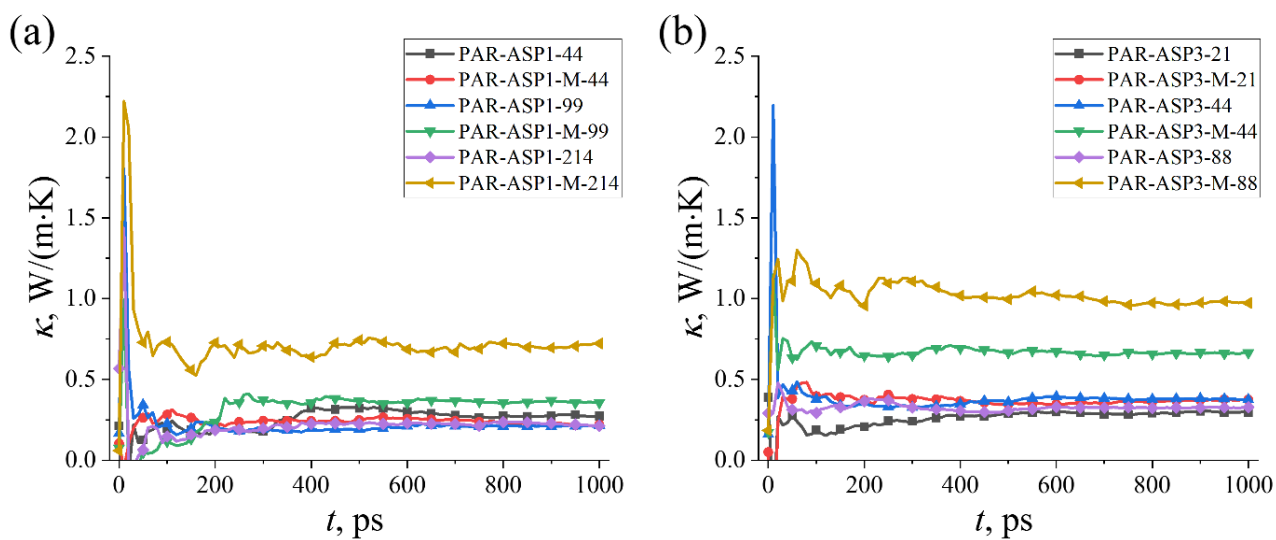

**Fig. S5.** The coefficient of thermal conductivity as a function of time ( $T=450$  K). The thermal conductivity was calculated over a 1 ns-long trajectory with a time step of 10 ps. Shown are the systems with ASP1/ASP1-M (a) and ASP3/ASP3-M (b) asphaltenes. Only last 500 ps of the presented curves were used for calculating the average values of the thermal conductivity coefficients.

## Definition of the vector normal to the asphaltene cores and the order parameter

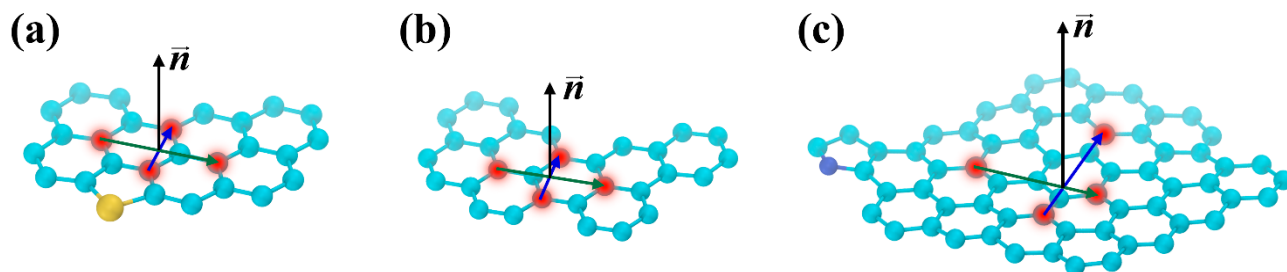

**Fig. S6.** Definition of vectors  $\vec{n}$  normal to the asphaltene cores in the case of (a) ASP1 and ASP1-M, (b) ASP2 and ASP2-M, and (c) ASP3 and ASP3-M molecules. The vectors  $\vec{n}$  were obtained as the cross products of blue and green in-plane vectors. Atoms that were used to form the in-plane vectors are marked in red. The order parameter was obtained as the largest eigenvalue of the ordering matrix with components  $Q_{\alpha\beta} = \left\langle (2N_{asp})^{-1} \sum_{i=1}^{N_{asp}} (3 \cdot n_{\alpha}^i n_{\beta}^i - \delta_{\alpha\beta}) \right\rangle$ , where  $N_{asp}$  is the number of asphaltene molecules in the system,  $n_{\alpha}^i$  and  $n_{\beta}^i$  denote the projections of unit vectors  $\vec{n}$  normal to the  $i$ th asphaltene core on the box axes  $\alpha$  and  $\beta$  ( $\alpha, \beta = x, y,$  and  $z$ ),  $\delta_{\alpha\beta}$  is the Kronecker delta, and  $\langle \dots \rangle$  denotes the average over time.
